# Supplementary material for: Gadolinium and Platinum in Tandem: Real-time Multi-Modal Monitoring of Drug Delivery by MRI and Fluorescence Imaging
Source: PubMed Central journal article supplement — Nanotheranostics. 2017 May 8;1(2):186–95. doi: 10.7150/ntno.18619 (PMC5646715; doi:10.7150/ntno.18619), 2017-05-08
Supplement: ntnov01p0186s1.pdf [file ntnov01p0186s1.pdf]

Supporting information for:

## **Gadolinium and Platinum in Tandem: Real-time Multi-Modal**

### **Monitoring of Drug Delivery by MRI and Fluorescence Imaging.**

Hongguang Li,<sup>1</sup> Bethany I. Harriss,<sup>2</sup> Alkystis Phinikaridou,<sup>3</sup> Sara Lacerda,<sup>3</sup> Gregory Ramniceanu,<sup>5,6</sup> Bich-Thuy Doan,<sup>5,6</sup> Ka-Lok Ho,<sup>1</sup> Chi-Fai Chan,<sup>1,4</sup> Wai-Sum Lo,<sup>4</sup> René M. Botnar,<sup>3</sup> Rongfeng Lan,<sup>1</sup> Cyrille Richard,<sup>5,6\*</sup> Ga-Lai Law,<sup>4,\*</sup> Nicholas J. Long<sup>2,\*</sup> and Ka-Leung Wong<sup>1,\*</sup>

1. Department of Chemistry, Hong Kong Baptist University, Kowloon Tong, Kowloon, Hong Kong SAR.
2. Department of Chemistry, Imperial College London, South Kensington Campus, London SW7 2AZ, UK.
3. King's College London, Division of Imaging Sciences, Lambeth Wing, St Thomas' Hospital London SE1 7EH.
4. Department of Applied Biology and Chemical Technology, Hong Kong Polytechnic University, Hung Hom, Hong Kong SAR.
5. Unité de Technologies Chimiques et Biologiques pour la Santé (UTCBS); CNRS UMR 8258; Inserm U 1022; Université Paris Descartes, Sorbonne Paris Cité, Faculté des Sciences Pharmaceutiques et Biologiques, 75006 Paris, France
6. Chimie-ParisTech, PSL, 75005 Paris, France.

\*Corresponding Authors: Ka-Leung Wong, PhD., Department of Chemistry, Hong Kong Baptist University, Kowloon Tong, Kowloon, Hong Kong SAR. Tel: 852-3411-2370. E-mail: [klwong@hkbu.edu.hk](mailto:klwong@hkbu.edu.hk); or Nicholas J. Long, PhD., Department of Chemistry, Imperial College London, South Kensington Campus, London SW7 2AZ, UK. Fax: +44 20 7594 5804; Tel: +44 20 7594 5781; E-mail: [n.long@imperial.ac.uk](mailto:n.long@imperial.ac.uk) or Ga-Lai Law, PhD., Department of Applied Biology and Chemical Technology, Hong Kong Polytechnic University, Hung Hom, Hong Kong SAR. E-mail: [ga-lai.law@polyu.edu.hk](mailto:ga-lai.law@polyu.edu.hk) or Cyrille Richard, PhD., CNRS, UMR 8258, Paris, France. E-mail: [cyrille.richard@parisdescartes.fr](mailto:cyrille.richard@parisdescartes.fr).

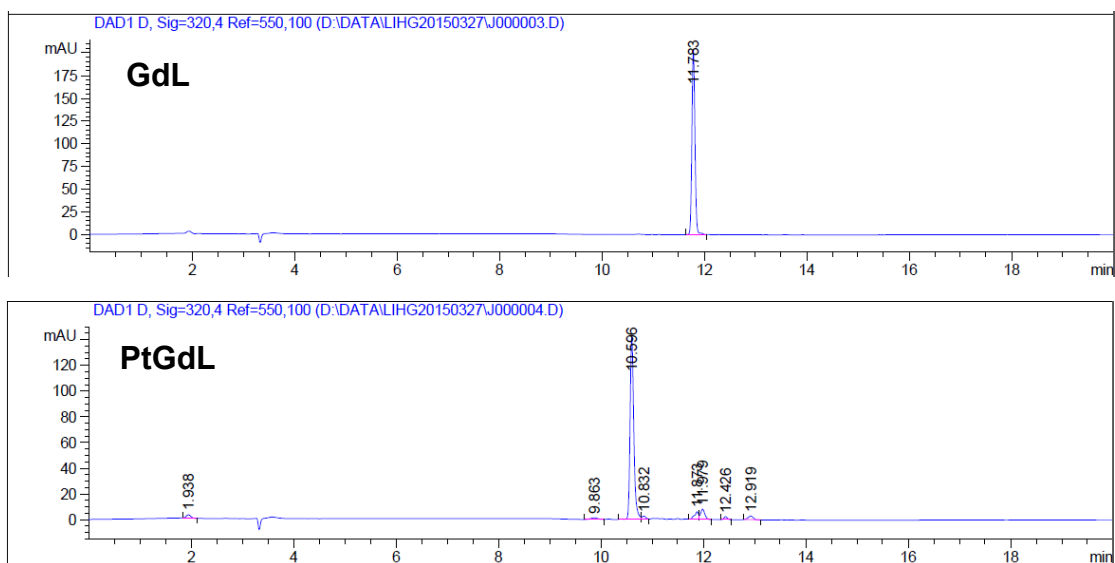

**Figure S1.** HPLC spectra of the **GdL** and **PtGdL**. Experimental conditions: Agilent ZORBAX SB-C18 Stable Bond Analytical 4.6 X 150 mm 5-micron column, solvent gradient show in table S1.

**Table S1.** Solvent gradient of the HPLC for characterization of **GdL** and **PtGdL**.

| Time /min | 0.05% TFA in water /% | 0.05% TFA in CH <sub>3</sub> CN /% | Flow rate/ mLmin <sup>-1</sup> |
|-----------|-----------------------|------------------------------------|--------------------------------|
| 0         | 90                    | 10                                 | 1.0                            |
| 5         | 90                    | 10                                 | 1.0                            |
| 15        | 60                    | 40                                 | 1.0                            |
| 20        | 90                    | 10                                 | 1.0                            |

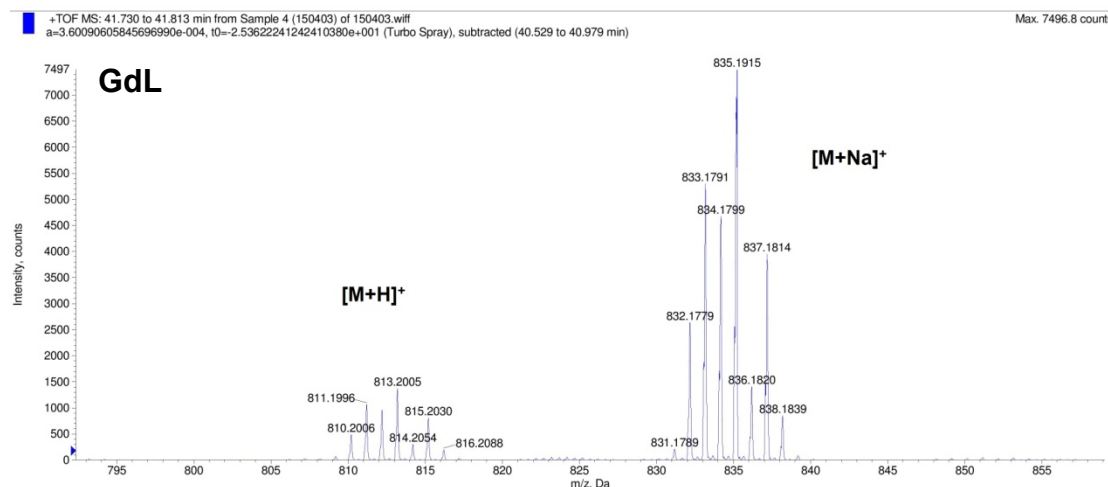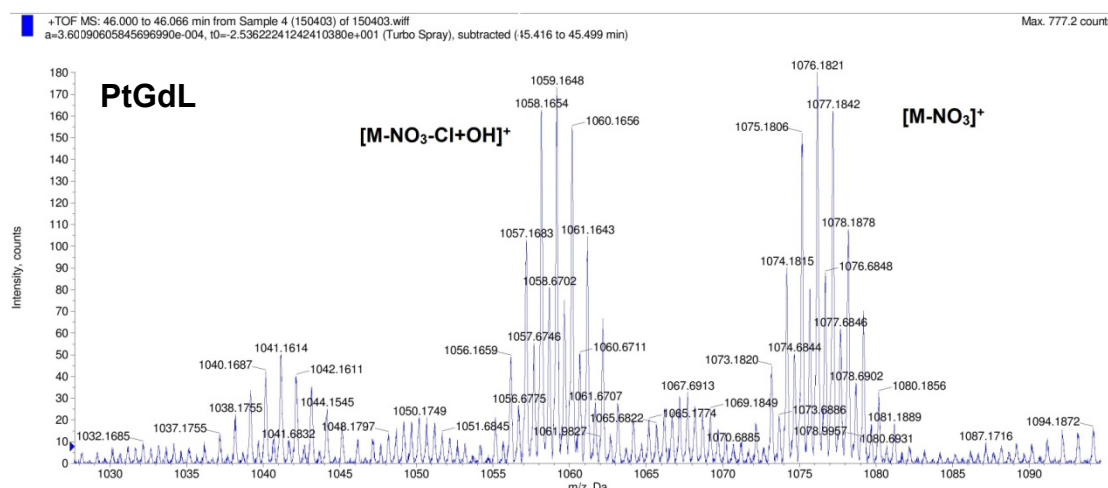

**Figure S2.** ESI-HRMS spectra of **GdL** and **PtGdL**. **GdL**: calcd. for  $C_{34}H_{37}GdN_7O_7$   $[M + H]^+$  813.1995, found 813.2005, for  $C_{34}H_{36}GdN_7NaO_7$   $[M + Na]^+$  835.1815, found 835.1915. **PtGdL**: HRMS (+ESI) m/z calcd. for  $C_{34}H_{42}ClGdN_9O_7Pt$   $[M - NO_3]^+$  1076.1784, found 1076.1821, for  $C_{34}H_{43}ClGdN_9O_8Pt$   $[M - NO_3 - Cl + OH]^+$  1058.2123, found 1058.1654.

**Table S2.** Photophysical properties and relaxivity of **PtGdL** and **GdL**.

| Complex      | $\lambda_{\max}/\text{nm}$ <sup>[a]</sup> | $\epsilon/\text{M}^{-1}\text{cm}^{-1}$ <sup>[a]</sup> | $q \pm 0.2$ <sup>[b]</sup> | $\phi/\%$ <sup>[d]</sup> | $r_1/\text{mM}^{-1}\text{s}^{-1}$ <sup>[e]</sup> |
|--------------|-------------------------------------------|-------------------------------------------------------|----------------------------|--------------------------|--------------------------------------------------|
| <b>PtGdL</b> | 327                                       | 22300                                                 | 1.0 <sup>[c]</sup>         | < 0.1                    | 29.4                                             |
| <b>GdL</b>   | 324                                       | 20000                                                 | 1.0                        | 3                        | 23.1                                             |

a) Absorption coefficient in H<sub>2</sub>O, 298 K; b) Coordination number of water molecules, the q value of **GdL** was determined by comparison of the emission lifetime of europium(III) analogue of **GdL**, **EuL** in D<sub>2</sub>O and H<sub>2</sub>O, which is reported in our previous work. (*Chem. Commun.* **2015**, 51, 14022; *J. Chem. Soc., Perkin Trans.* **1999**, 2, 493.) c) For **PtGdL** the q value could not be determined by using the same method with **GdL** because **PtEuL** is non-emissive, however **PtGdL** should have the same hydration number ( $q = 1.0 \pm 0.2$ ) as **GdL** due to the similarity of structure. d) Fluorescence quantum yield of the ligand emission of the complexes was determined by integrated sphere methods. (*Chem. Rev.* **2010**, 110, 2729.) e)  $T_1$  relaxivity of the Gd(III) complexes at 10 MHz, 25 °C.

**Table S3.** IC<sub>50</sub> (μM) values of **PtGdL**, **GdL** and cisplatin (as control) in HeLa and WPMY-1 cells under dark and UVA irradiation.<sup>[a]</sup>

| Complex          | HeLa                  |                                     | WPMY-1                |                                     |
|------------------|-----------------------|-------------------------------------|-----------------------|-------------------------------------|
|                  | Dark IC <sub>50</sub> | UVA <sup>[b]</sup> IC <sub>50</sub> | Dark IC <sub>50</sub> | UVA <sup>[b]</sup> IC <sub>50</sub> |
| <b>PtGdL</b>     | 23.6 ± 0.8            | 3.8 ± 0.7                           | 43.9 ± 1.1            | ~6.9 ± 1.1                          |
| <b>GdL</b>       | > 200                 | > 200                               | > 200                 | > 200                               |
| <b>Cisplatin</b> | 3.3 ± 0.3             | 3.4 ± 0.7                           | 4.2 ± 0.6             | 4.1 ± 0.9                           |

a) Incubation time = 24 hour; b) λ<sub>ex</sub> = 365 nm, light dosage = 1 Jcm<sup>-2</sup>. Raw data shows in Figure S3.

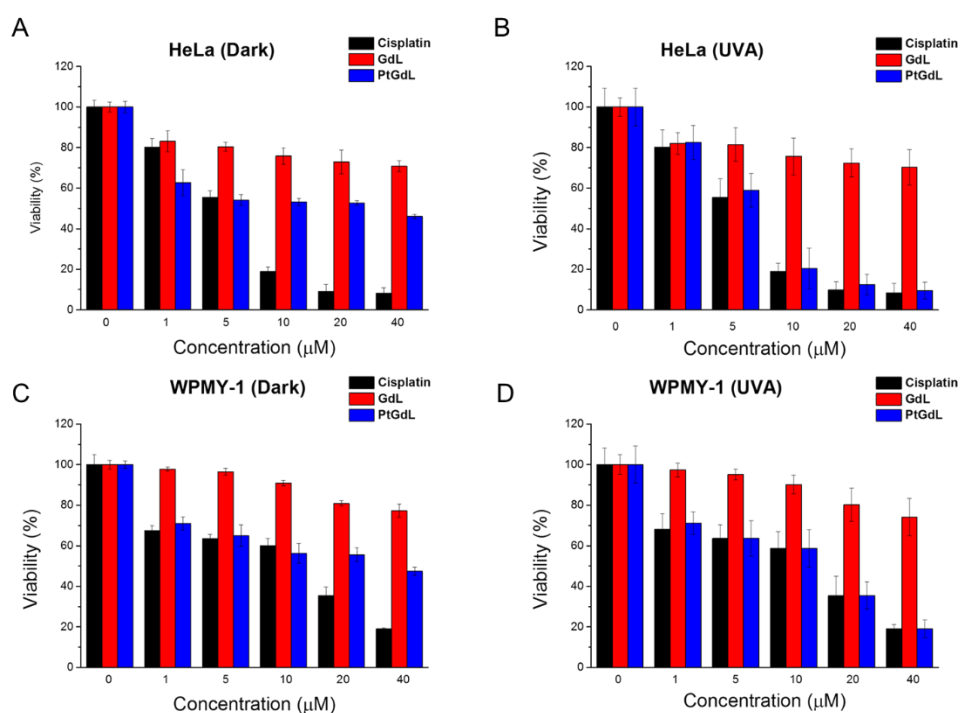

**Figure S3.** Raw data of MTT dark (A and C) and photo (B and D) cytotoxicity in Table S3.

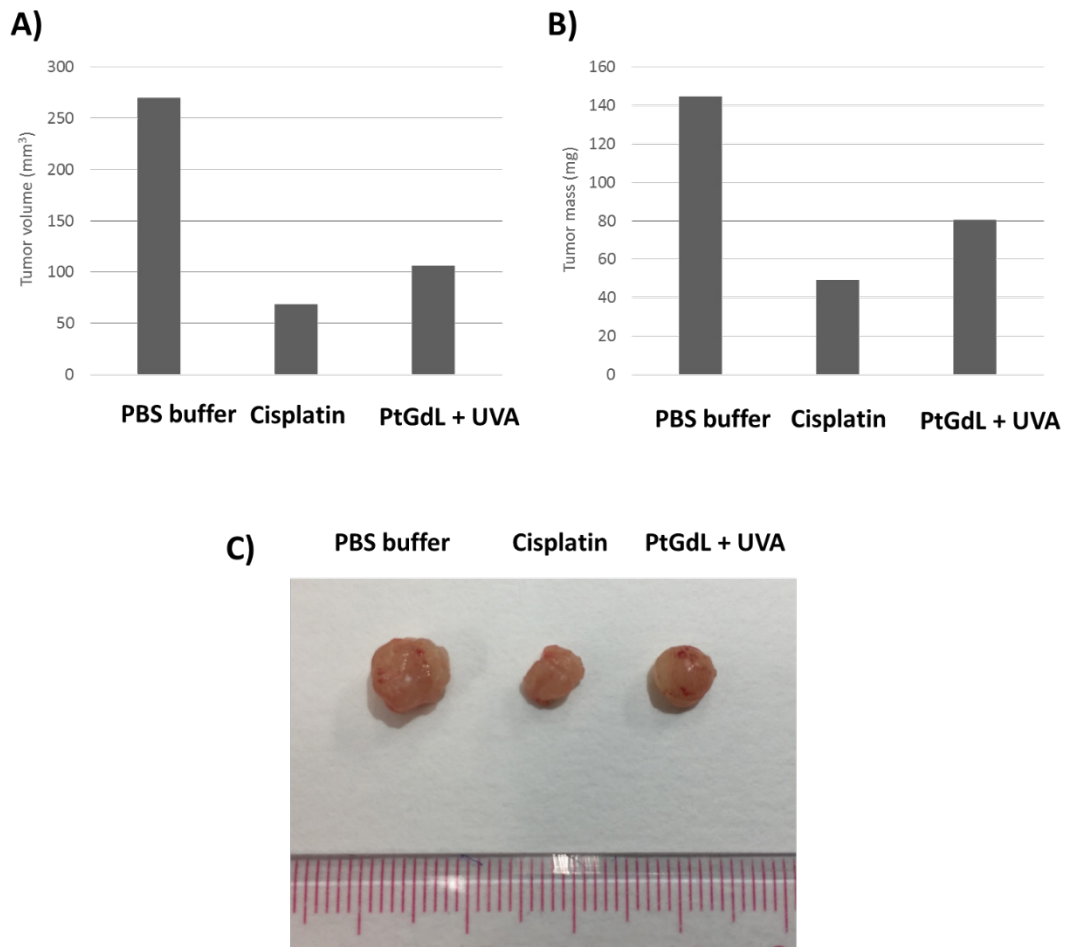

**Figure S4.** *In vivo* tumor inhibition of **PtGdL** with UVA irradiation. A) The volume, (B) mass and the photograph of the tumor after 14 days treatment of the PBS buffer (control), cisplatin (control) and **PtGdL** + UVA.

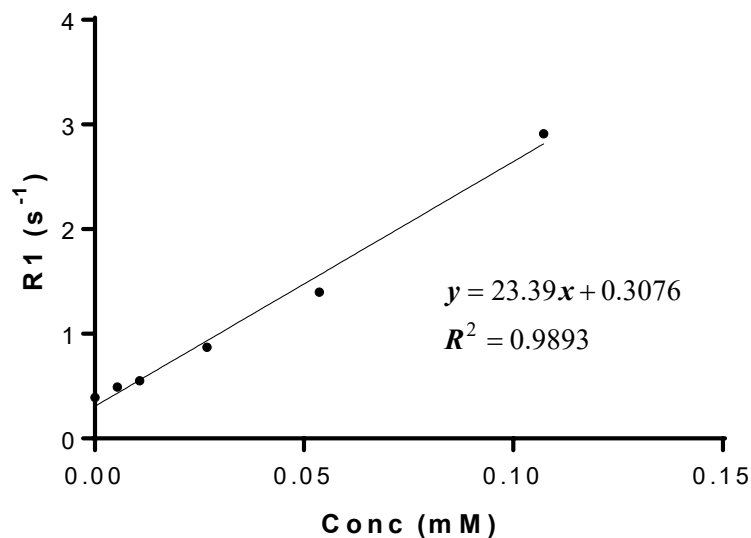

**Figure S5.** The plot of  $R_1$  versus the concentration of **PtGdL** in aqueous solution. Linear fitting of the data gives a relaxivity of **PtGdL** =  $23.4 \text{ mM}^{-1}\text{s}^{-1}$ , at 3T and 25°C.

**Table S4.** Raw data of the  $T_1$  relativity of **PtGdL** at 3T (25°C) in Figure S4.

| Conc. <sup>[a]</sup> (mol/L) | $T_1$ (ms) <sup>[b]</sup><br>( $\pm$ SD) | $R_1$ (s <sup>-1</sup> ) <sup>[c]</sup> |
|------------------------------|------------------------------------------|-----------------------------------------|
| 1.07E-04                     | 343 $\pm$ 13                             | 2.91                                    |
| 5.36E-05                     | 713 $\pm$ 73                             | 1.40                                    |
| 2.68E-05                     | 1148 $\pm$ 25                            | 0.87                                    |
| 1.07E-05                     | 1805 $\pm$ 44                            | 0.55                                    |
| 5.36E-06                     | 2047 $\pm$ 35                            | 0.49                                    |
| PBS                          | 2507 $\pm$ 45                            | 0.39                                    |

[a] The concentration of Gd(III) was corrected by ICP-MS. [b] The longitudinal relaxation  $T_1$  is the average of  $T_1$  values of three slices and SD is the standard deviation, for each sample. [c] The relaxation rate,  $R_1 = 1/T_1$ .

|                               | Size (d.nm...        | % Intensity | Width (d.n... |
|-------------------------------|----------------------|-------------|---------------|
| <b>Z-Average (d.nm):</b> 4252 | <b>Peak 1:</b> 671.6 | 100.0       | 47.98         |
| <b>Pdl:</b> 0.156             | <b>Peak 2:</b> 0.000 | 0.0         | 0.000         |
| <b>Intercept:</b> 0.577       | <b>Peak 3:</b> 0.000 | 0.0         | 0.000         |

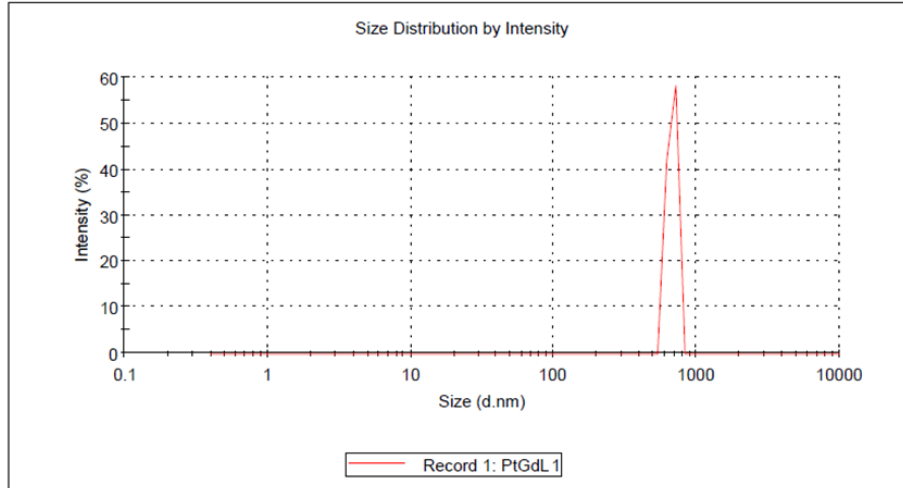

**Figure S6.** DLS spectrum of **PtGdL** in aqueous solution. The DLS spectrum of **PtGdL** proves that **PtGdL** could form aggregations in aqueous solution.
